# Supplementary material for: Educational Interventions to Promote Cervical Cancer Screening among Rural Populations: A Systematic Review
Source: MDPI journal article supplement (doi:10.3390/ijerph19116874), 2022-06-04
Supplement: s1 [file s1]

| <b>MEDLINE</b> | <b>Search statement</b>                                                   | <b>Result</b> |
|----------------|---------------------------------------------------------------------------|---------------|
| 1              | ((uterine or cerv*) and (cancer or neoplasm*)).mp.                        | 172419        |
| 2              | early detection of cancer/                                                | 31833         |
| 3              | (screen* or test*).mp.                                                    | 4497774       |
| 4              | 2 or 3                                                                    | 4504351       |
| 5              | (pap* and (test or smear)).mp.                                            | 71806         |
| 6              | (thinprep cytolog* test or TCT).mp.                                       | 1350          |
| 7              | (HPV and (test* or samp*)).mp.                                            | 17475         |
| 8              | 5 or 6 or 7                                                               | 83784         |
| 9              | 4 or 8                                                                    | 4510563       |
| 10             | 1 and 9                                                                   | 42553         |
| 11             | educat*.mp.                                                               | 1025632       |
| 12             | (uptak* or atten* or particip* or adheren*).mp.                           | 2571548       |
| 13             | knowledge.mp.                                                             | 730002        |
| 14             | (attitude or awareness or perception or accep* or intention or will*).mp. | 2270943       |
| 15             | 12 or 13 or 14                                                            | 4805385       |
| 16             | 10 and 11 and 15                                                          | 2586          |
| 17             | (rural or countryside* or village).mp.                                    | 175314        |
| 18             | 16 and 17                                                                 | 274           |

| EMBASE | Search statement                                                          | Result  |
|--------|---------------------------------------------------------------------------|---------|
| 1      | ((uterine or cerv*) and (cancer or neoplasm*)).mp.                        | 199137  |
| 2      | early detection of cancer/                                                | 8121    |
| 3      | (screen* or test*).mp.                                                    | 6613655 |
| 4      | 2 or 3                                                                    | 6613655 |
| 5      | (pap* and (test or smear)).mp.                                            | 196509  |
| 6      | (thinprep cytolog* test or TCT).mp.                                       | 4338    |
| 7      | (HPV and (test* or samp*)).mp.                                            | 29750   |
| 8      | 5 or 6 or 7                                                               | 215890  |
| 9      | 4 or 8                                                                    | 6628725 |
| 10     | 1 and 9                                                                   | 65297   |
| 11     | educat*.mp.                                                               | 1450714 |
| 12     | (uptak* or atten* or particip* or adheren*).mp.                           | 3869234 |
| 13     | knowledge.mp.                                                             | 1034754 |
| 14     | (attitude or awareness or perception or accep* or intention or will*).mp. | 3710416 |
| 15     | 12 or 13 or 14                                                            | 7410430 |
| 16     | 10 and 11 and 15                                                          | 4196    |
| 17     | (rural or countryside* or village).mp.                                    | 231155  |
| 18     | 16 and 17                                                                 | 491     |

| PubMed | Search statement                                                    | Result  |
|--------|---------------------------------------------------------------------|---------|
| 1      | ((uterine or cerv*) and (cancer or neoplasm*))                      | 212599  |
| 2      | early detection of cancer[MeSH Terms]                               | 31819   |
| 3      | screen*[Title/Abstract] OR test*[Title/Abstract]                    | 4192380 |
| 4      | 2 or 3                                                              | 4200003 |
| 5      | (pap or papanicolaou) and (test or smear)                           | 16024   |
| 6      | thinprep cytolog* test or TCT                                       | 3034    |
| 7      | HPV and (test* or samp*)                                            | 19997   |
| 8      | 5 or 6 or 7                                                         | 35313   |
| 9      | 4 or 8                                                              | 4212003 |
| 10     | 1 and 9                                                             | 46699   |
| 11     | educat*[Title/Abstract]                                             | 697887  |
| 12     | uptak* or atten* or particip* or adheren*                           | 3066432 |
| 13     | knowledge                                                           | 901909  |
| 14     | attitude or awareness or perception or accep* or intention or will* | 3514630 |
| 15     | 12 or 13 or 14                                                      | 6298216 |
| 16     | 10 and 11 and 15                                                    | 2656    |
| 17     | rural or countryside* or village                                    | 249159  |
| 18     | 16 and 17                                                           | 315     |

| Web of Science | Search statement                                                          | Result   |
|----------------|---------------------------------------------------------------------------|----------|
| 1              | TS=((cerv* OR uterine) AND (cancer OR neoplasm*))                         | 119203   |
| 2              | TS=(early detection of cancer)                                            | 50317    |
| 3              | TS=(screen* OR test*)                                                     | 7247097  |
| 4              | 2 or 3                                                                    | 7276398  |
| 5              | TS=((pap OR papanicolaou) AND (test or smear) )                           | 16006    |
| 6              | TS=(thinprep cytolog* test or TCT)                                        | 3673     |
| 7              | TS=(HPV and (test* or samp*) )                                            | 19664    |
| 8              | 5 or 6 or 7                                                               | 35273    |
| 9              | 4 or 8                                                                    | 7286563  |
| 10             | 1 and 9                                                                   | 38346    |
| 11             | TS=educat*                                                                | 1612320  |
| 12             | ALL=(uptak* or atten* or particip* or adheren*)                           | 4772596  |
| 13             | ALL=(knowledge)                                                           | 2050966  |
| 14             | ALL=(attitude or awareness or perception or accep* or intention or will*) | 6617638  |
| 15             | 12 or 13 or 14                                                            | 11688768 |
| 16             | 10 and 11 and 15                                                          | 2600     |
| 17             | ALL=(rural or countryside* or village)                                    | 611776   |
| 18             | 16 and 17                                                                 | 342      |

| <b>CINAHL</b> | <b>Search statement</b>                                                | <b>Result</b> |
|---------------|------------------------------------------------------------------------|---------------|
| 1             | AB ( uterine or cerv* ) AND AB ( cancer or neoplasm* )                 | 15771         |
| 2             | TX early detection of cancer                                           | 23200         |
| 3             | AB screen* OR AB test*                                                 | 733948        |
| 4             | 2 OR 3                                                                 | 747071        |
| 5             | TX ( pap or papanicolaou ) AND TX ( test or smear )                    | 14401         |
| 6             | TX thinprep cytolog* test OR TX TCT                                    | 1426          |
| 7             | TX HPV AND TX ( test* or samp* )                                       | 11872         |
| 8             | 5 OR 6 OR 7                                                            | 24340         |
| 9             | 4 OR 8                                                                 | 761740        |
| 10            | 1 AND 9                                                                | 8386          |
| 11            | AB educat*                                                             | 332552        |
| 12            | TX uptak* or atten* or particip* or adheren*                           | 1620701       |
| 13            | TX knowledge                                                           | 674395        |
| 14            | TX attitude or awareness or perception or accep* or intention or will* | 2639893       |
| 15            | 12 OR 13 OR 14                                                         | 3340060       |
| 16            | 10 AND 11 AND 15                                                       | 1323          |
| 17            | TX rural or countryside* or village                                    | 204241        |
| 18            | 16 AND 17                                                              | 271           |

| <b>Cochrane</b> | <b>Search statement</b>                                             | <b>Result</b> |
|-----------------|---------------------------------------------------------------------|---------------|
| 1               | (cerv* OR uterine) AND (cancer OR neoplasm*)                        | 9347          |
| 2               | MeSH descriptor: [Early Detection of Cancer] explode all trees      | 1384          |
| 3               | screen* OR test*                                                    | 470453        |
| 4               | 2 OR 3                                                              | 470540        |
| 5               | (pap OR papanicolaou) AND (test OR smear)                           | 1767          |
| 6               | thinprep cytolog* test OR TCT                                       | 1187          |
| 7               | HPV AND (test* OR samp*)                                            | 1741          |
| 8               | 5 OR 6 OR 7                                                         | 4344          |
| 9               | 4 OR 8                                                              | 471814        |
| 10              | 1 AND 9                                                             | 3650          |
| 11              | educat*                                                             | 106893        |
| 12              | uptak* or atten* or particip* or adheren*                           | 427090        |
| 13              | knowledge                                                           | 48893         |
| 14              | attitude or awareness or perception or accep* or intention or will* | 411790        |
| 15              | 12 OR 13 OR 14                                                      | 674972        |
| 16              | 10 AND 11 AND 15                                                    | 643           |
| 17              | rural or countryside* or village                                    | 12577         |
| 18              | 16 AND 17                                                           | 94            |
| 19              | Searched in Cochrane Central Register of Controlled Trials          | 48            |

| Global Health | Search statement                                                          | Result |
|---------------|---------------------------------------------------------------------------|--------|
| 1             | ((uterine or cerv*) and (cancer or neoplasm*)).mp.                        | 23853  |
| 2             | early detection of cancer.mp.                                             | 148    |
| 3             | (screen* or test*).mp.                                                    | 835310 |
| 4             | 2 or 3                                                                    | 835353 |
| 5             | (pap* and (test or smear)).mp.                                            | 23226  |
| 6             | (thinprep cytolog* test or TCT).mp.                                       | 386    |
| 7             | (HPV and (test* or samp*)).mp.                                            | 10595  |
| 8             | 5 or 6 or 7                                                               | 30091  |
| 9             | 4 or 8                                                                    | 838517 |
| 10            | 1 and 9                                                                   | 13407  |
| 11            | educat*.mp.                                                               | 192543 |
| 12            | (uptak* or atten* or particip* or adheren*).mp.                           | 531920 |
| 13            | knowledge.mp.                                                             | 159067 |
| 14            | (attitude or awareness or perception or accep* or intention or will*).mp. | 352807 |
| 15            | 12 or 13 or 14                                                            | 887434 |
| 16            | 10 and 11 and 15                                                          | 1298   |
| 17            | (rural or countryside* or village).mp.                                    | 117133 |
| 18            | 16 and 17                                                                 | 169    |

| <b>Clinical trials</b> | <b>Search statement</b>                           | <b>Result</b> |
|------------------------|---------------------------------------------------|---------------|
| 1                      | Cervical cancer screening AND education AND rural | 61            |
